# Supplementary material for: Plasmonic gold and luminescent silicon nanoplatforms for multimode imaging of cancer cells
Source: Royal Society of Chemistry journal article supplement (doi:10.1039/c2ib20100c), 2012-08-29
Supplement: c2ib20100c.pdf [file c2ib20100c.pdf]

Supporting Information :

**Plasmonic Gold and Luminescent Silicon Nanoplatfoms for Multimode Imaging of Cancer Cells**

**Folarin Erogbogbo,<sup>a</sup> Xin Liu,<sup>a</sup> Jasmine L. May,<sup>b</sup> Mark T. Swihart,<sup>a</sup> and Paras N. Prasad <sup>\*b</sup>**

Table S2. Differences between silica and silicon

|                                                                                      |                                                                                        |
|--------------------------------------------------------------------------------------|----------------------------------------------------------------------------------------|
| Silica in nanostructures                                                             | Silicon nanocrystals                                                                   |
| Formula – SiO <sub>2</sub>                                                           | Formula - Si                                                                           |
| Used to encapsulate active materials e.g gold                                        | Used as Active Material e.g. optical imaging                                           |
| Amorphous                                                                            | Crystalline                                                                            |
| Non-Luminescent                                                                      | Luminescent                                                                            |
| Well studied                                                                         | New and novel material                                                                 |
| Generally used as a Controllable Coating                                             | Never used as coating                                                                  |
| Never used for size controlled emission                                              | Used for sized tunable emission                                                        |
| Not the main focus of studies (other materials, such as gold, quantum dots, drugs, ) | The main focus of its’ studies ( how can it be used for imaging, how does it interact) |
|                                                                                      |                                                                                        |

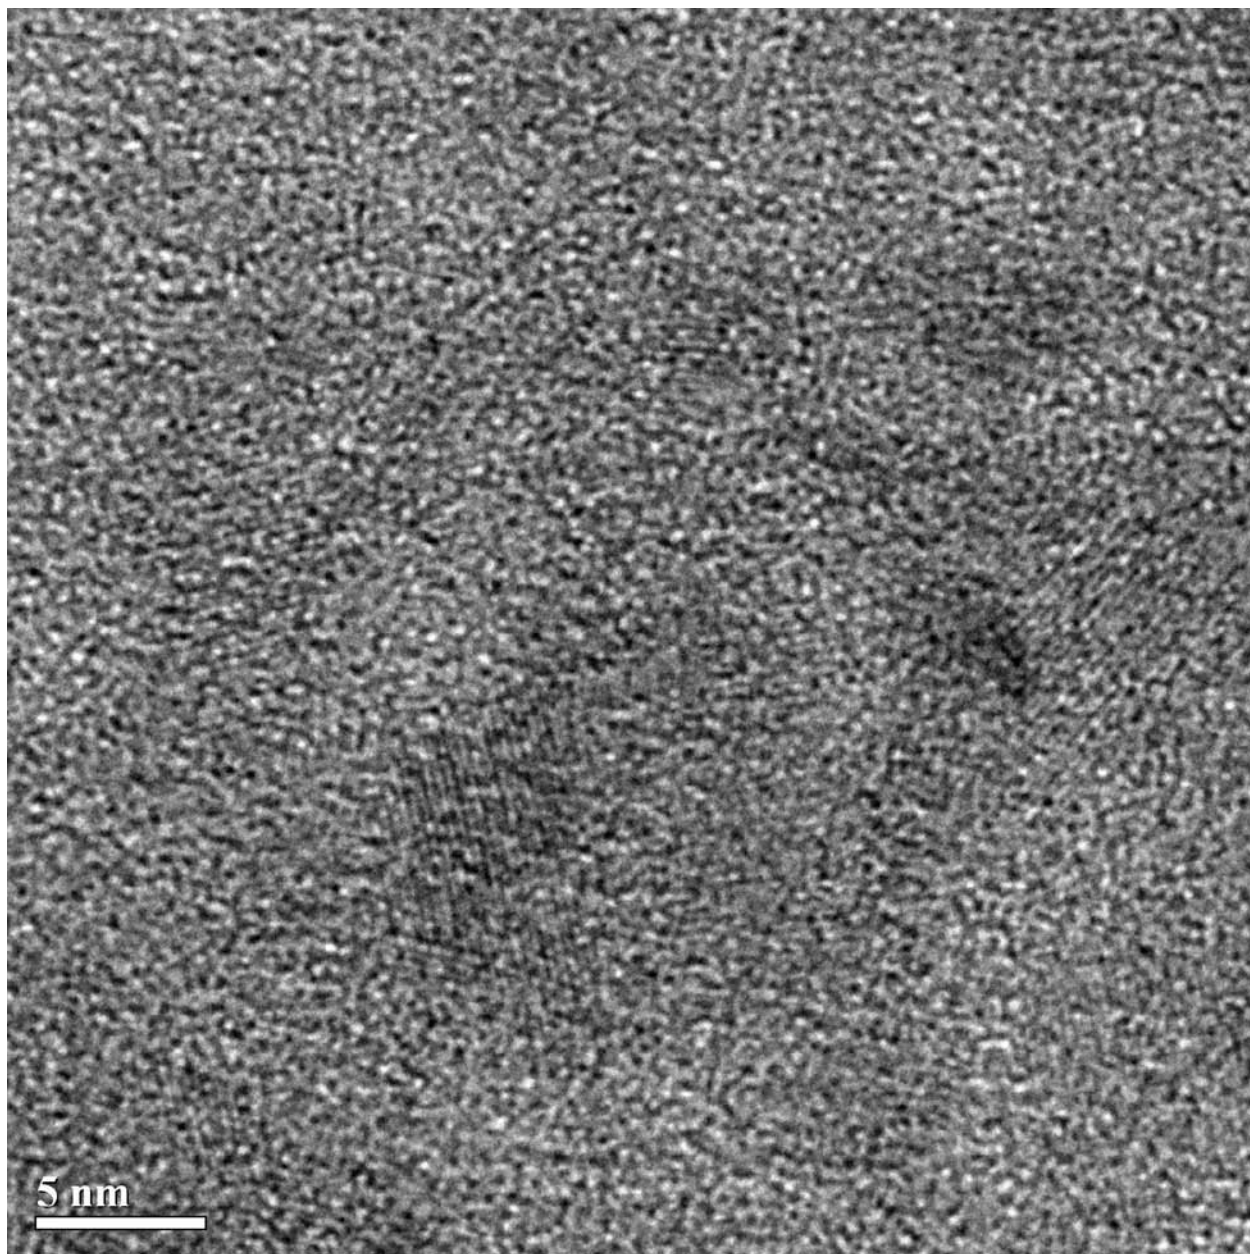

Figure S1. Transmission electron microscopy image of ethyl undecylenate terminated silicon quantum dots.

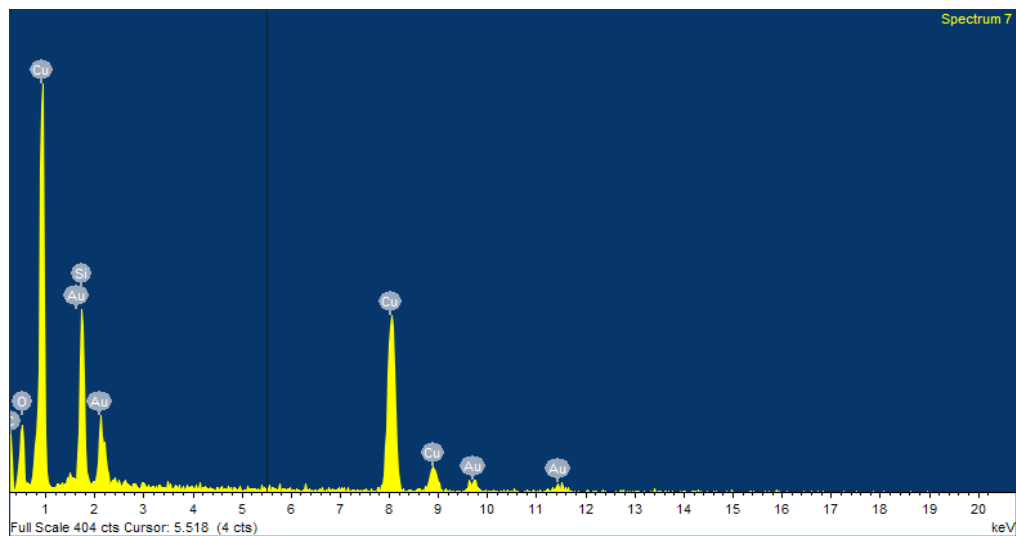

Figure S2. EDS analysis of the Si/Au nanostructure

Table S2. Atomic ratio and weight ratio data from EDS

|                  | Silicon | Gold | Carbon | Copper | Oxygen |
|------------------|---------|------|--------|--------|--------|
| Atomic Ratio (%) | 3.44    | 0.38 | 67.08  | 4.49   | 24.60  |
| Weight Ratio (%) | 5.84    | 4.57 | 48.63  | 17.21  | 23.76  |

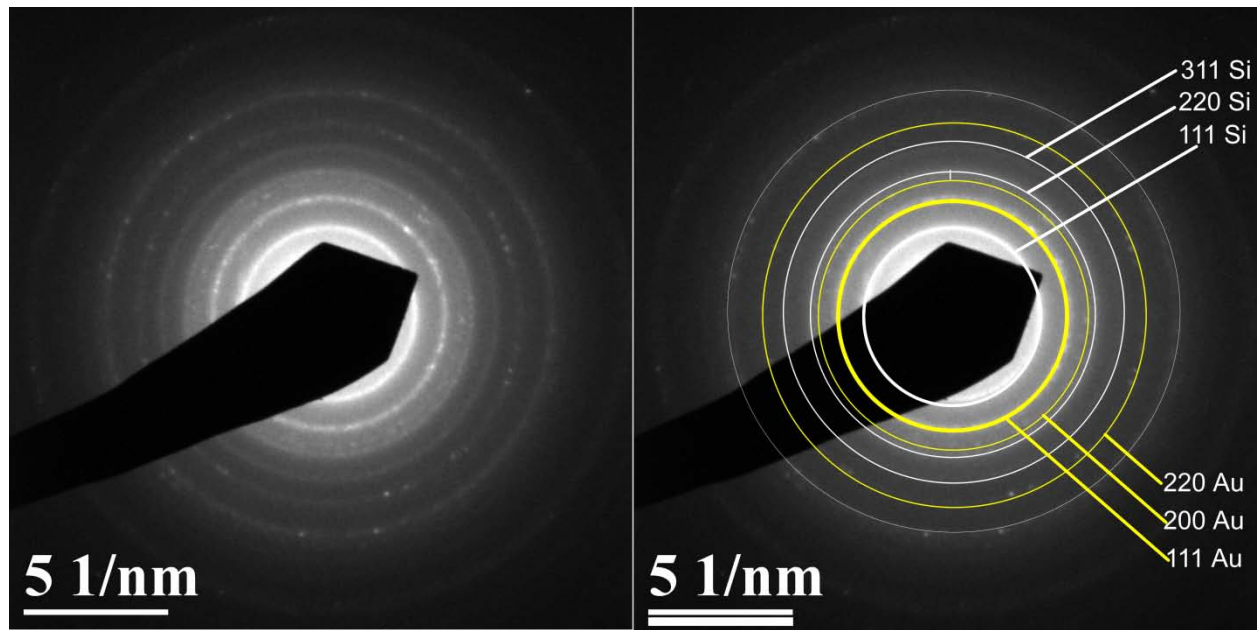

Figure S2. Selected Area Electron Diffraction Showing different planes of Silicon and Gold from a golden silicon sample.

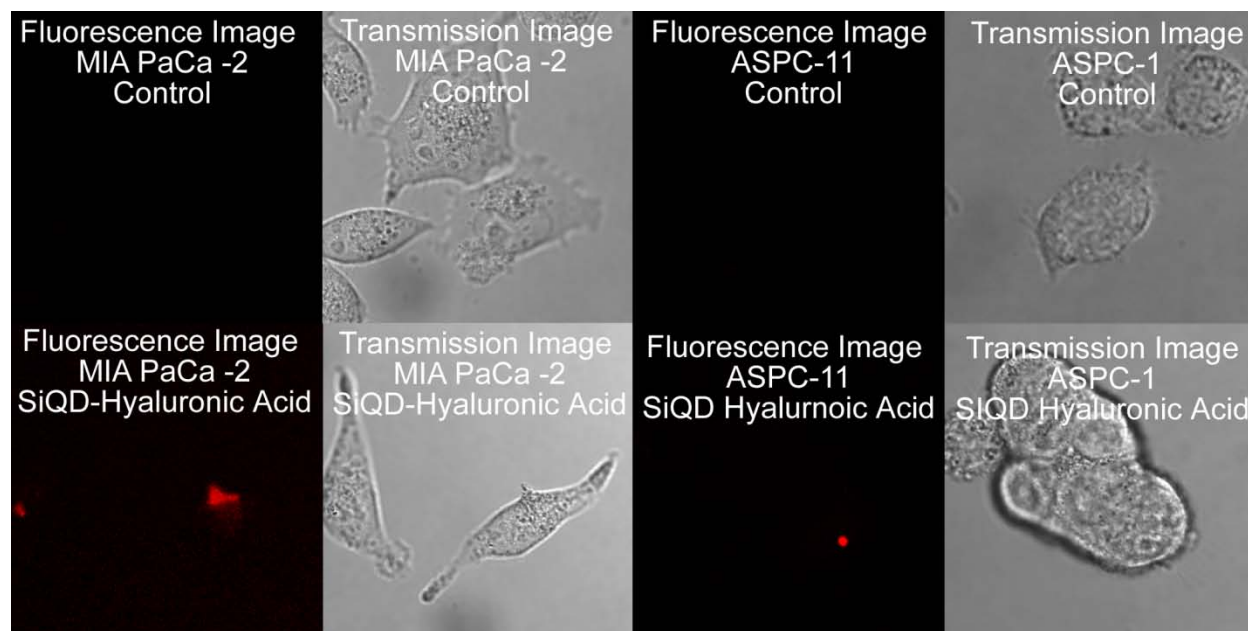

Figure S3. Preliminary Imaging of pancreatic cancer cells targeted with SiQDS for imaging.

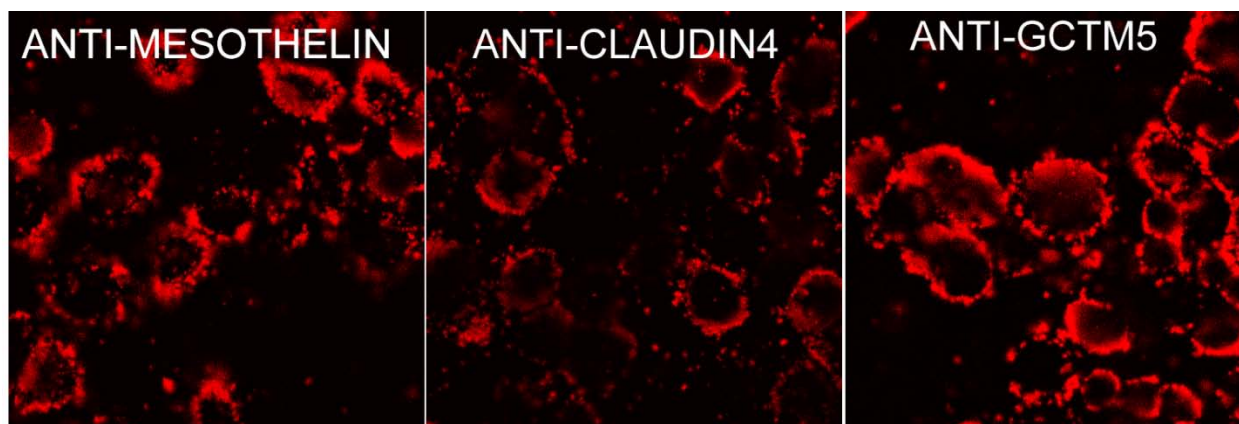

Figure S4. Imaging of Panc-1 cancer cells targeted with SiQDs functionalized with Anti-mesothelin, Anti-Claudin4 and Anti-GCTM5
